# Supplementary material for: Cruaute et amitie d'apres montaigne et shakespeare renaissance d'une theologie laique
Source: PLOS journal article supplement (doi:10.1371/journal.ppat.1009075), 1999-01-01
Supplement: S2 (10.1371/journal.ppat.1009075.s002) [file journal.ppat.1009075.s002]

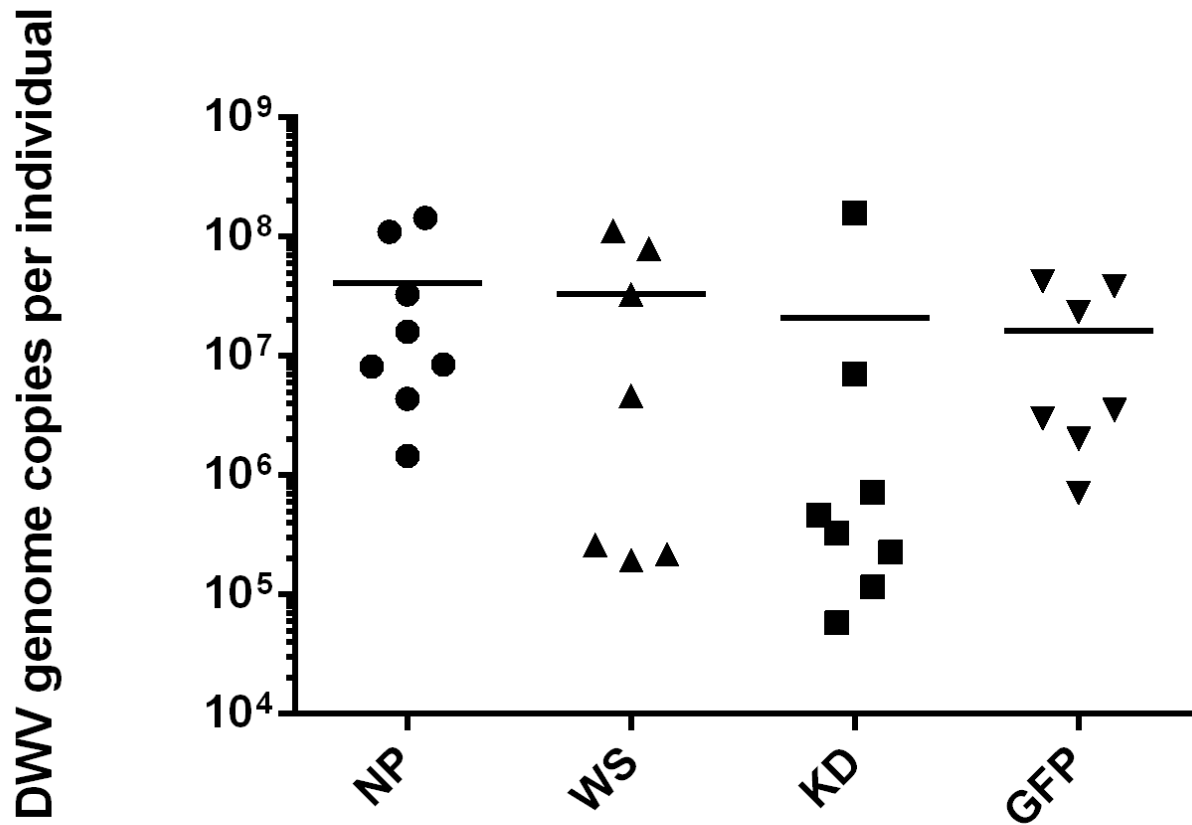

**S2 Fig. DWV titers in honey bee pupae used for transcriptional analyses and in survival assays of mites.** Log scale values of DWV genome copies registered in individual honey bee pupae, for each experimental group considered (NP: non-parasitized controls; WS: pupae infested with mites soaked in saline solution; KD: pupae infested with mites soaked in Vd-CHIsal dsRNA solution; GFP: pupae infested with mites soaked in GFP dsRNA solution), are reported. The line indicates the mean value, which did not differ among the different experimental conditions.
